# Supplementary material for: Mechanistic investigation on the toxicity of MgO nanoparticles toward cancer cells
Source: Royal Society of Chemistry journal article supplement (doi:10.1039/c2jm35087d), 2012-01-01
Supplement: c2jm35087d.pdf [file c2jm35087d.pdf]

Electronic Supplementary Information for  
**Mechanistic Investigation on the Toxicity of MgO Nanoparticles toward  
Cancer Cells**

Karthikeyan Krishnamoorthy,<sup>1</sup> Jeong Yong Moon,<sup>2</sup> Ho Bong Hyun,<sup>2</sup>

Somi Kim Cho,<sup>2</sup> Sang-Jae Kim,<sup>1,3,\*</sup>

<sup>1</sup>Nanomaterials and System Laboratory, Department of Mechanical Engineering, Jeju National University,  
Jeju – 690 756, Republic of Korea.

<sup>2</sup>Faculty of Biotechnology, College of Applied Life Sciences, Jeju National University,  
Jeju – 690 756, Republic of Korea.

<sup>3</sup>Nanomaterials and System Laboratory, Department of Mechatronics Engineering, Jeju National University,  
Jeju – 690 756, Republic of Korea.

\*Corresponding author. Email: [kimsangj@jejunu.ac.kr](mailto:kimsangj@jejunu.ac.kr)

## 1. DLS measurement of MgO NPs

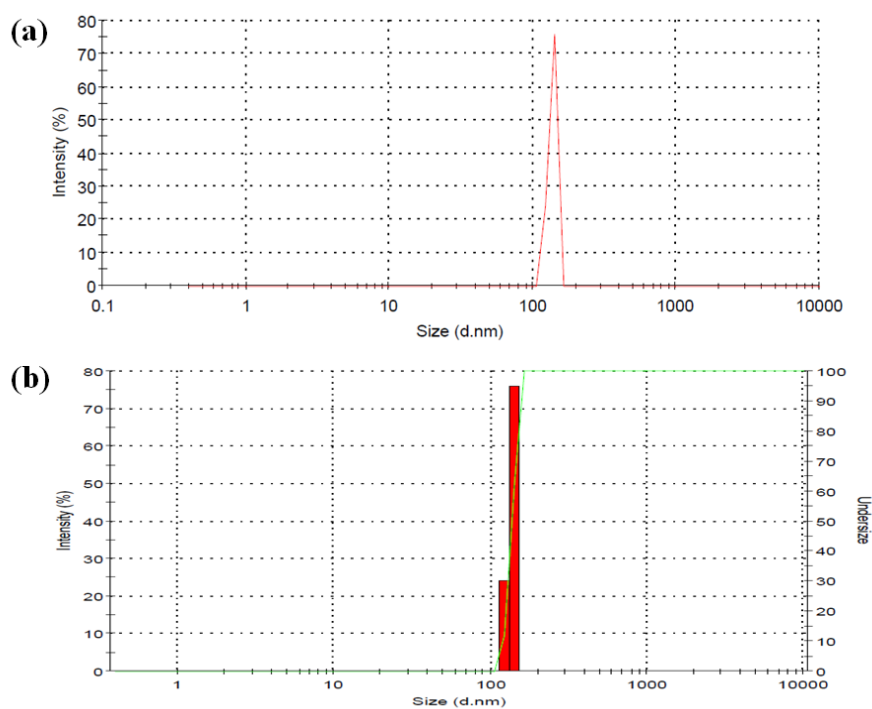

Figure S1. DLS measurement of MgO NPs a) size plot b) histogram fit.
